# Supplementary material for: A potent, broadly protective vaccine against SARS-CoV-2 variants of concern
Source: PubMed Central journal article supplement (PMC9653380; doi:10.1038/s41541-022-00571-0), 2022-11-12
Supplement: 41541_2022_571_MOESM1_ESM.pdf [file 41541_2022_571_MOESM1_ESM.pdf]

# **A Potent, Broadly Protective Vaccine Against SARS-CoV-2 Variants of Concern**

## **SUPPLEMENTARY INFORMATION**

Ziyan Wang<sup>a#</sup>, Chenliang Zhou<sup>a##</sup>, Jiao An<sup>a#</sup>, Kunpeng Liu<sup>b#</sup>, Pin Yu<sup>c#</sup>,  
Xin Fang<sup>d#</sup>, Jiadai Li<sup>a#</sup>, Hua Zhu<sup>c</sup>, Qianjun Zhu<sup>a</sup>, Chuanqi Huang<sup>a</sup>, Chao  
Zhang<sup>a</sup>, Binbin Zhao<sup>c</sup>, Linlin Bao<sup>c</sup>, Yujiao Song<sup>a</sup>, Xiayao Cao<sup>a</sup>, Dongdong  
Hu<sup>a</sup>, Yuanxiang Jiang<sup>a</sup>, Likang Shi<sup>a</sup>, Lingyun Zhou<sup>a</sup>, Jiang Fan<sup>a</sup>, Wuxiang  
Guan<sup>b,e</sup>, Zhongyu Hu<sup>d\*</sup>, Zhiming Yuan<sup>f\*</sup>, Jiangning Liu<sup>c\*</sup>, Chao Shan<sup>b,e\*</sup>, Ge  
Liu<sup>a\*</sup>

<sup>a</sup> Shanghai Zerun Biotech Co., Ltd., Shanghai, 201203, China

<sup>b</sup> State Key Laboratory of Virology, Wuhan Institute of Virology, Chinese Academy of Sciences, Wuhan, Hubei, 430071, China

<sup>c</sup> Institute of Laboratory Animal Sciences, Chinese Academy of Medical Sciences (CAMS) and Comparative Medicine Center, Peking Union Medical College, Beijing, 100021, China

<sup>d</sup> National Institutes for Food and Drug Control (NIFDC), Beijing, 102629, China

<sup>e</sup> Hubei Jiangxia Laboratory, Wuhan, Hubei, 430200, China

<sup>f</sup> Center for Biosafety Mega-Science, Wuhan Institute of Virology, Chinese Academy of Sciences, Wuhan, Hubei, 430271, China

\*Corresponding Authors:

Dr. Ge Liu: E-mail: [liuge@walvax.com](mailto:liuge@walvax.com), Shanghai Zerun Biotech Co., Ltd.

Supplementary Figure 1. Gating strategy for detection of IFN- $\gamma^+$ /IL-2 $^+$ /TNF- $\alpha^+$  Cells within CD4 $^+$  and CD8 $^+$ T cell populations.

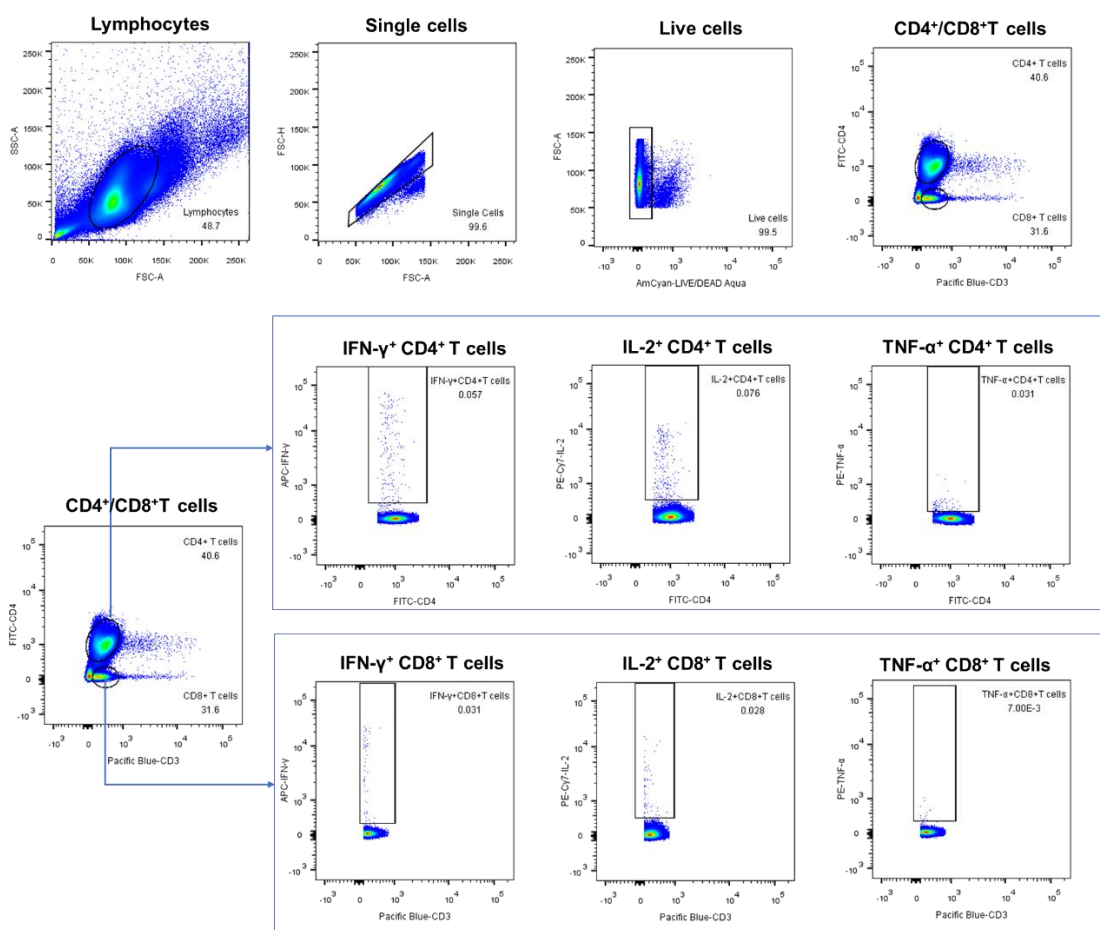

Supplementary Table 1. S spike peptide pool from Wuhan-Hu-1 strain. Each peptide is 18 amino acids in length with 7 amino acids offset and 11 amino acids overlapped.

| Index | Peptide Sequence | Index | Peptide Sequence |
|-------|------------------|-------|------------------|
|-------|------------------|-------|------------------|

|    |                     |     |                     |
|----|---------------------|-----|---------------------|
| 1  | QCVNLTTRTQLPPAYTNS  | 86  | AVLYQDVNCTEVPVAIHA  |
| 2  | RTQLPPAYTNSFTRGVYY  | 87  | NCTEVPVAIHADQLTPTW  |
| 3  | YTNSFTRGVYYPDKVFRS  | 88  | AIHADQLTPTWRVYSTGS  |
| 4  | GVYYPDKVFRSSVLHSTQ  | 89  | TPTWRVYSTGSNVFQTRA  |
| 5  | VFRSSVLHSTQDLFLPFF  | 90  | STGSNVFQTRAGCLIGAE  |
| 6  | HSTQDLFLPFFSNVTWFH  | 91  | QTRAGCLIGAEHVNNSYE  |
| 7  | LPFFSNVTWFHAIHVSGT  | 92  | IGAEHVNNSYECDIPIGA  |
| 8  | TWFHAIHVSGTNGTKRFD  | 93  | NSYECDIPIGAGICASYQ  |
| 9  | VSGTNGTKRFDNPVLPFN  | 94  | PIGAGICASYQTQTNSPG  |
| 10 | KRFDNPVLPFNDGVYFAS  | 95  | ASYQTQTNSPGGSGSVAS  |
| 11 | LPFNDGVYFASTEKSNI I | 96  | NSPGGSGSVASQSIIAYT  |
| 12 | YFASTEKSNIIRGWIFGT  | 97  | SVASQSIIAYTMSLGAEN  |
| 13 | SNIIRGWIFGTTLDSKTQ  | 98  | IAYTMSLGAENSVAYSNN  |
| 14 | IFGTTLDSKTQSLIVNN   | 99  | GAENSVAYSNNNSIAIPTN |
| 15 | SKTQSLIVNNATNVVIK   | 100 | YSNNNSIAIPTNFTISVTT |
| 16 | IVNNATNVVIKVCEFQFC  | 101 | IPTNFTISVTTEILPVSM  |
| 17 | VVIKVCEFQFCNDPFLGV  | 102 | SVTTEILPVSMTKTSVDC  |
| 18 | FQFCNDPFLGVYYHKNNK  | 103 | PVSMTKTSVDCTMYICGD  |
| 19 | FLGVYYHKNNKSWMESEF  | 104 | SVDCTMYICGDSTECSNL  |
| 20 | KNNKSWMESEFRVYSSAN  | 105 | ICGDSTECSNLLQYGSF   |
| 21 | ESEFRVYSSANNCTFEYV  | 106 | CSNLLQYGSFCTQLNRA   |
| 22 | SSANNCTFEYVSQPFLMD  | 107 | YGSFCTQLNRALTGIAVE  |
| 23 | FEYVSQPFLMDLEGKQGN  | 108 | LNRRALTGIAVEQDKNTQE |
| 24 | FLMDLEGKQGNFKNLREF  | 109 | IAVEQDKNTQEVFAQVKQ  |
| 25 | KQGNFKNLREFVFKNIDG  | 110 | NTQEVFAQVKQIYKTPPI  |
| 26 | LREFVFKNIDGYFKIYSK  | 111 | QVKQIYKTPPIKDFGGFN  |
| 27 | NIDGYFKIYSKHTPINLV  | 112 | TPPIKDFGGFNFSQILPD  |
| 28 | IYSKHTPINLVRDLPQGF  | 113 | GGFNFSQILPDPSKPSKR  |
| 29 | INLVRDLPQGFSALEPLV  | 114 | ILPDPSKPSKRSFIEDLL  |
| 30 | PQGFSALEPLVDLPIGIN  | 115 | PSKRSFIEDLLFNKVTLA  |
| 31 | EPLVDLPIGINITRFQTL  | 116 | EDLLFNKVTLADAGFIKQ  |
| 32 | IGINITRFQTLALHRSY   | 117 | VTLADAGFIKQYGDCLGD  |
| 33 | FQTLALHRSYLTPGDSS   | 118 | FIKQYGDCLGDIAARDLI  |
| 34 | HRSYLTPGDSSSGWTAGA  | 119 | CLGDIAARDLICAQKFNG  |
| 35 | GDSSSGWTAGAAAYVGY   | 120 | RDLICAQKFNGLTVLPPL  |
| 36 | TAGAAAYVGYLQPRTFL   | 121 | KFNGLTVLPPLLTDEMIA  |
| 37 | YVGYLQPRTFLLKYNENG  | 122 | LPPLLTDEMIAQYTSALL  |
| 38 | RTFLLKYNENGTITDAVD  | 123 | EMIAQYTSALLAGTITSG  |
| 39 | NENGTITDAVDCALDPLS  | 124 | SALLAGTITSGWTFGAGA  |
| 40 | DAVDCALDPLSETKCTLK  | 125 | ITSGWTFGAGAALQIPFA  |
| 41 | DPLSETKCTLKSFVEKG   | 126 | GAGAALQIPFAMQMAYRF  |
| 42 | CTLKSFTVEKGIYQTSNF  | 127 | IPFAMQMAYRFNGIGVTQ  |
| 43 | VEKGIYQTSNFRVQPTES  | 128 | AYRFNGIGVTQNVLYENQ  |
| 44 | TSNFRVQPTESIVRFPNI  | 129 | GVTQNVLYENQKLIANQF  |

|    |                     |     |                       |
|----|---------------------|-----|-----------------------|
| 45 | PTESIVRFPNITNLCPFG  | 130 | YENQKLIANQFNSAIGKI    |
| 46 | FPNITNLCPFGEVFNATR  | 131 | ANQFNSAIGKIQDSLST     |
| 47 | CPFGEVFNATRFASVYAW  | 132 | IGKIQDSLSTASALGKL     |
| 48 | NATRFASVYAWNRKRISN  | 133 | LSSTASALGKLQDVVNQN    |
| 49 | VYAWNRKRISNCVADYSV  | 134 | LGKLQDVVNQNAQALNTL    |
| 50 | RISNCVADYSVLYNSASF  | 135 | VNQNAQALNTLVKQLSSN    |
| 51 | DYSVLYNSASFSTFKCYG  | 136 | LNTLVKQLSSNFGAISSV    |
| 52 | SASFSTFKCYGVSPTKLN  | 137 | LSSNFGAISSVLNDILSR    |
| 53 | KCYGVSPTKLNLDLCFTNV | 138 | ISSVLNDILSRLDPPEAE    |
| 54 | TKLNLDLCFTNVYADSFVI | 139 | ILSRLDPPEAEVQIDRLI    |
| 55 | FTNVYADSFVIRGDEVQR  | 140 | PEAEVQIDRLITGRLQSL    |
| 56 | SFVIRGDEVQRQIAPGQTG | 141 | DRLITGRLQSLQTYVTQQ    |
| 57 | EVQRQIAPGQTGKIADYNY | 142 | LQSLQTYVTQQLRAAEI     |
| 58 | GQTGKIADYNYKLPDDFT  | 143 | VTQQLRAAEIRASANLA     |
| 59 | DYNYKLPDDFTGCVIAWN  | 144 | AAEIRASANLAATKMSEC    |
| 60 | DDFTGCVIAWNSNNLDSK  | 145 | ANLAATKMSECVLGQSKR    |
| 61 | IAWNSNNLDSKVGGNYY   | 146 | MSECVLGQSKRVDFCGKG    |
| 62 | LDSKVGGNYYLYRFLFRK  | 147 | QSKRVDFCGKGYHLMSFP    |
| 63 | NYYLYRFLFRKSNLKPFE  | 148 | CGKGYHLMSFPQSAPHGV    |
| 64 | LFRKSNLKPFERDISTEI  | 149 | MSFPQSAPHGVVFLHVTY    |
| 65 | KPFERDISTEIQAGSTP   | 150 | PHGVVFLHVTYVPAQEK     |
| 66 | STEIQAGSTPCNGVEGF   | 151 | HVTYVPAQEKNF'TTAPAI   |
| 67 | GSTPCNGVEGFNCYFPLQ  | 152 | QEKNF'TTAPAI CHDGKAH  |
| 68 | VEGFNCYFPLQSYGFQPT  | 153 | APAICHDGKAHF'PREGVF   |
| 69 | FPLQSYGFQPTNGVGYQP  | 154 | GKAHF'PREGV'FVSN'GTHW |
| 70 | FQPTNGVGYQPYRVVLS   | 155 | EGVFVSN'GTHWFV'TQRNF  |
| 71 | GYQPYRVVLSFELLHAP   | 156 | GTHWFV'TQRNFYEP'QIIT  |
| 72 | VVLSFELLHAPATVCGPK  | 157 | QRNFYEP'QIIT'DNTFVS   |
| 73 | LHAPATVCGPKKSTNLVK  | 158 | QIIT'DNTFVSGNCDVVI    |
| 74 | CGPKKSTNLVKNKCVNFN  | 159 | TFVSGNCDV'VIGIVNNTV   |
| 75 | NLVKNKCVNFN'FNGLTGT | 160 | DV'VIGIVNNTVYDPLQPE   |
| 76 | VNFN'FNGLTGTGVLTESN | 161 | NNTVYDPLQPELDSFKEE    |
| 77 | LTGTGVLTESNKKFLPFQ  | 162 | LQPELDSFKEELD'KYFKN   |
| 78 | TESNKKFLPFQQFGRDIA  | 163 | FKEELD'KYFKNHTSPD'VD  |
| 79 | LPFQQFGRDIADTTDAVR  | 164 | YFKNHTSPD'VDLGDISGI   |
| 80 | RDIADTTDAVRDPQ'TLEI | 165 | PD'VDLGDISGINASV'VNI  |
| 81 | DAVRDPQ'TLEILDITPCS | 166 | ISGINASV'VNIQKEIDRL   |
| 82 | TLEILDITPCSFGGVS'VI | 167 | VVNIQKEIDRLNEVAKNL    |
| 83 | TPCSFGGVS'VITPGTNTS | 168 | IDRLNEVAKNLNESLIDL    |
| 84 | VSVITPGTNTSNQVAVLY  | 169 | AKNLNESLIDLQELGKYE    |
| 85 | TNTSNQVAVLYQDVNCTE  | 170 | SLIDLQELGKYEQYIKWP *  |

Note: \* End of sequence, overlap 12 AA
